# Supplementary material for: The F⋯HO intramolecular hydrogen bond forming five-membered rings hardly appear in monocyclic organofluorine compounds
Source: Royal Society of Chemistry journal article supplement (doi:10.1039/c2ra00039c), 2012-01-01
Supplement: c2ra00039c.pdf [file c2ra00039c.pdf]

## Supplementary Information

### F...HO intramolecular hydrogen bond forming five-membered rings hardly appears in monocyclic organofluorine compounds

Rodrigo A. Cormanich,<sup>a</sup> Matheus P. Freitas,<sup>\*,b</sup> Cláudio F. Tormena<sup>a</sup> and Roberto Rittner<sup>a</sup>

<sup>a</sup> Chemistry Institute, State University of Campinas, P.O. Box 6154, 13083-970, Campinas, SP, Brazil

<sup>b</sup> Chemistry Department, Federal University of Lavras, P. O. BOX 3037, 37200-000, Lavras, MG, Brazil.

\* E-mail: matheus@dqi.ufla.br

#### Table of Contents

Page 2. Selected geometric parameters for compounds **1-Cl** to **10-Cl** (interatomic distances in angstroms and bond angles in degrees).

Page 3. Electronic density and its Laplacian at the H-bond BCP ( $\rho_{\text{HBBCP}}$  and  $\nabla^2\rho_{\text{HBBCP}}$ , respectively) and hydroxyl hydrogen integrated atomic properties for the conformers **A** and **B** of 3-chlorobuta-1,3-dien-2-ol (**1-Cl**), obtained by QTAIM (in au).

Page 4. Geometric representations for the conformer **A** of compounds **1-Cl** to **10-Cl**.

Page 5. Molecular graphs of compounds **1-Cl** to **10-Cl** (conformer **A**). Green points represent bond critical points (BCP) and red points indicate ring critical points (RCP).

Page 6. Selected geometric parameters for compounds **1-Br** to **10-Br** (interatomic distances in angstroms and bond angles in degrees).

Page 7. Electronic density and its Laplacian at the H-bond BCP ( $\rho_{\text{HBBCP}}$  and  $\nabla^2\rho_{\text{HBBCP}}$ , respectively) and hydroxyl hydrogen integrated atomic properties for the conformers **A** and **B** of 3-bromobuta-1,3-dien-2-ol (**1-Br**), obtained by QTAIM (in au).

Page 8. Geometric representations for the conformer **A** of compounds **1-Br** to **10-Br**.

Page 9. Molecular graphs of compounds **1-Br** to **10-Br** (conformer **A**). Green points represent bond critical points (BCP) and red points indicate ring critical points (RCP).

Page 10. Structure and geometrical representation of 2-fluorophenol derivatives obtained from the Cambridge Structural Data.

Page 11. Selected geometric parameters for the reference compound **1** and of 2-fluorophenol derivatives obtained from the Cambridge Structural Database (interatomic distances in angstroms and bond angles in degrees).

Page 12. References of compounds obtained from the Cambridge Structural Database (CSD).

## Chlorine derivatives

**Table S1:** Selected geometric parameters for compounds **1-Cl** to **10-Cl** (interatomic distances in angstroms and bond angles in degrees).

| Compound     | $r(\text{Cl}\cdots\text{HO})$ | $r(\text{Cl}\cdots\text{O})$ | $\angle \text{O-C-C(Cl)}$ | $\angle \text{Cl-C-C(O)}$ | $\angle \text{C-C(Cl)-C(O)}$ | $\angle \text{C-C(O)-C(Cl)}$ |
|--------------|-------------------------------|------------------------------|---------------------------|---------------------------|------------------------------|------------------------------|
| <b>1-Cl</b>  | <b>2.24</b>                   | <b>2.90</b>                  | <b>117.9</b>              | <b>114.7</b>              | <b>127.8</b>                 | <b>123.1</b>                 |
| <b>2-Cl</b>  | 3.23                          | 3.65                         | 132.2                     | 132.3                     | 89.8                         | 90.8                         |
| <b>3-Cl</b>  | 3.31                          | 3.62                         | 139.7                     | 135.7                     | 89.1                         | 90.7                         |
| <b>4-Cl</b>  | 2.56                          | 3.13                         | 124.4                     | 120.9                     | 114.2                        | 111.8                        |
| <b>5-Cl</b>  | 2.58                          | 3.15                         | 123.8                     | 121.0                     | 110.9                        | 108.5                        |
| <b>6-Cl</b>  | 2.72                          | 3.25                         | 127.4                     | 124.2                     | 108.5                        | 107.0                        |
| <b>7-Cl</b>  | 2.74                          | 3.26                         | 127.4                     | 124.4                     | 107.2                        | 105.8                        |
| <b>8-Cl</b>  | 2.36                          | 2.99                         | 119.7                     | 116.6                     | 122.4                        | 118.9                        |
| <b>9-Cl</b>  | 2.41                          | 3.01                         | 123.1                     | 118.2                     | 121.6                        | 118.4                        |
| <b>10-Cl</b> | 2.27                          | 2.92                         | 117.6                     | 113.1                     | 131.1                        | 124.3                        |

**Table S2:** Electronic density and its Laplacian at the H-bond BCP ( $\rho_{\text{HBCP}}$  and  $\nabla^2\rho_{\text{HBCP}}$ , respectively) and hydroxyl hydrogen integrated atomic properties for the conformers **A** and **B** of 3-chlorobuta-1,3-dien-2-ol (**1-Cl**), obtained by QTAIM (in au).

| <b>Conformer</b> | $\rho_{\text{HBCP}}$ | $\nabla^2\rho_{\text{HBCP}}$ | $q(\text{H})$ | $E(\text{H})$ | $M_1(\text{H})$ | $V(\text{H})$ |
|------------------|----------------------|------------------------------|---------------|---------------|-----------------|---------------|
| <b>A</b>         | 0.025                | +0.075                       | +0.599        | -0.3450       | 0.159           | 0.018         |
| <b>B</b>         | -                    | -                            | +0.591        | -0.3524       | 0.169           | 0.013         |

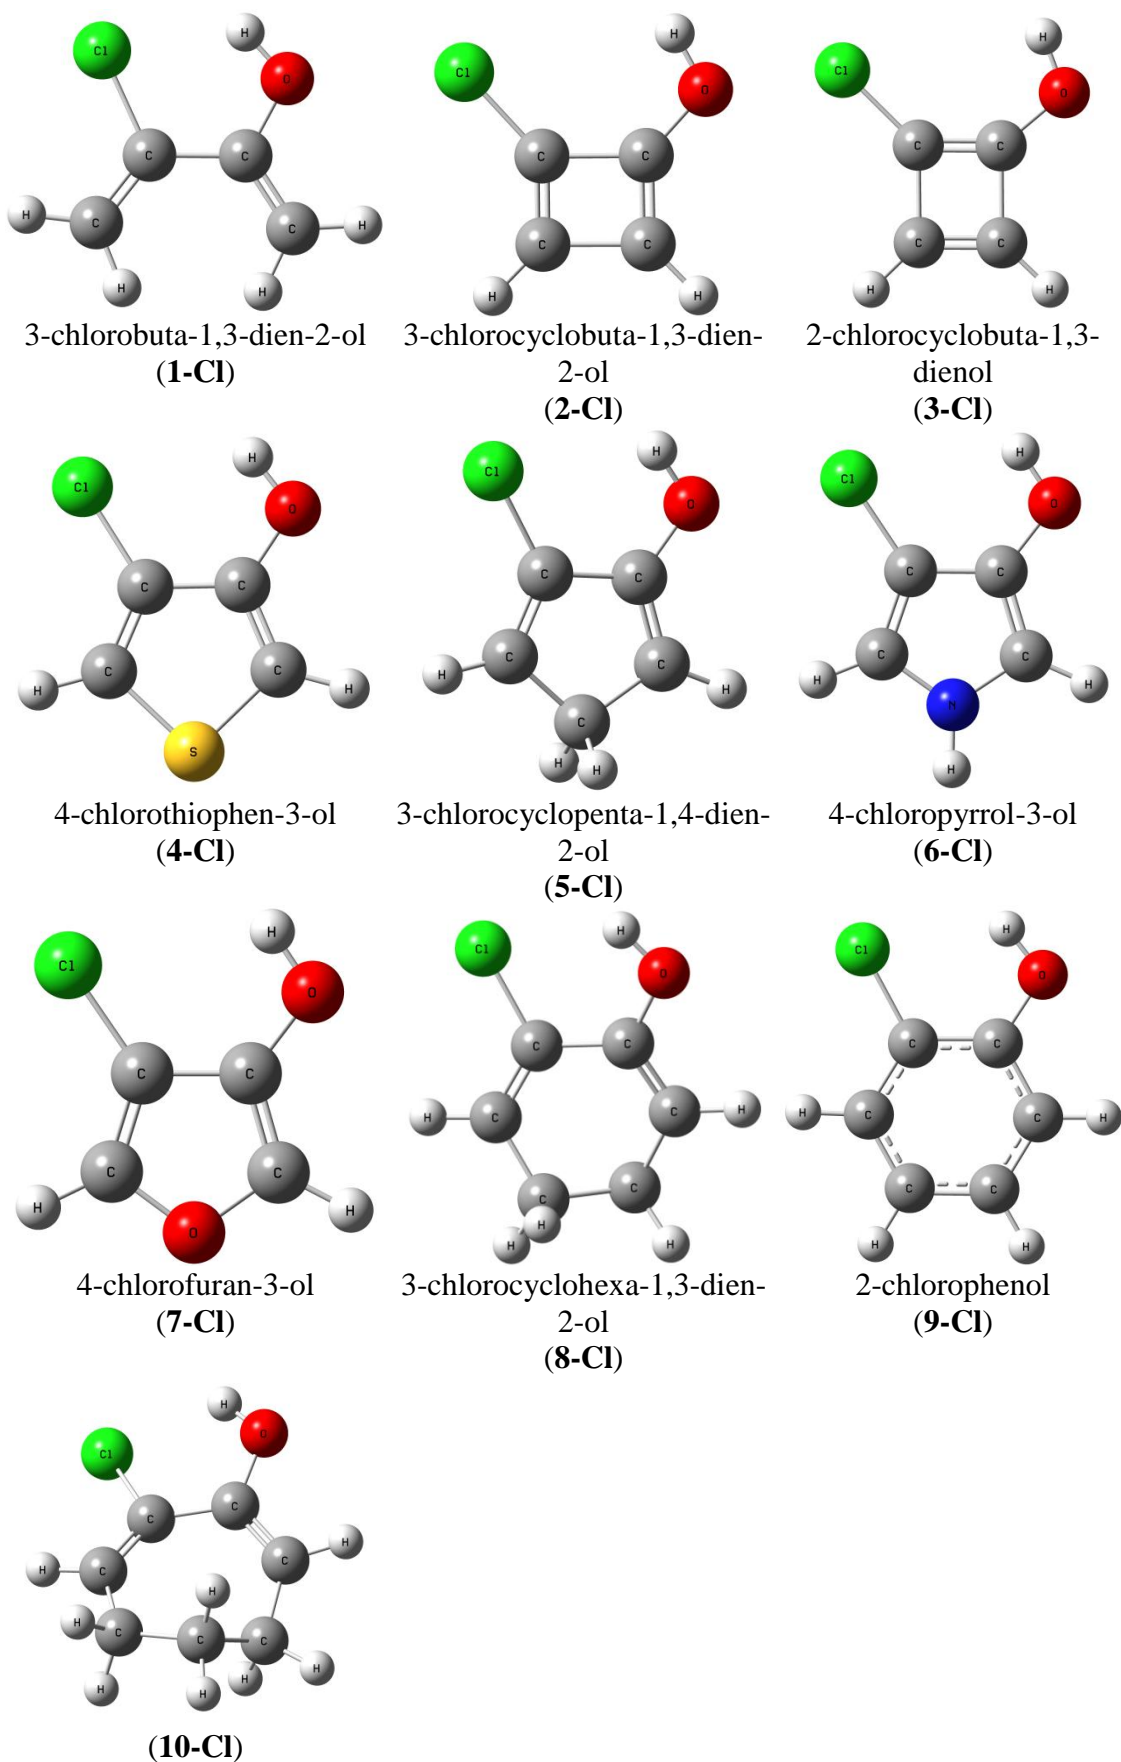

**Figure S1:** Geometric representations for the conformer **A** of compounds **1-Cl** to **10-Cl**.

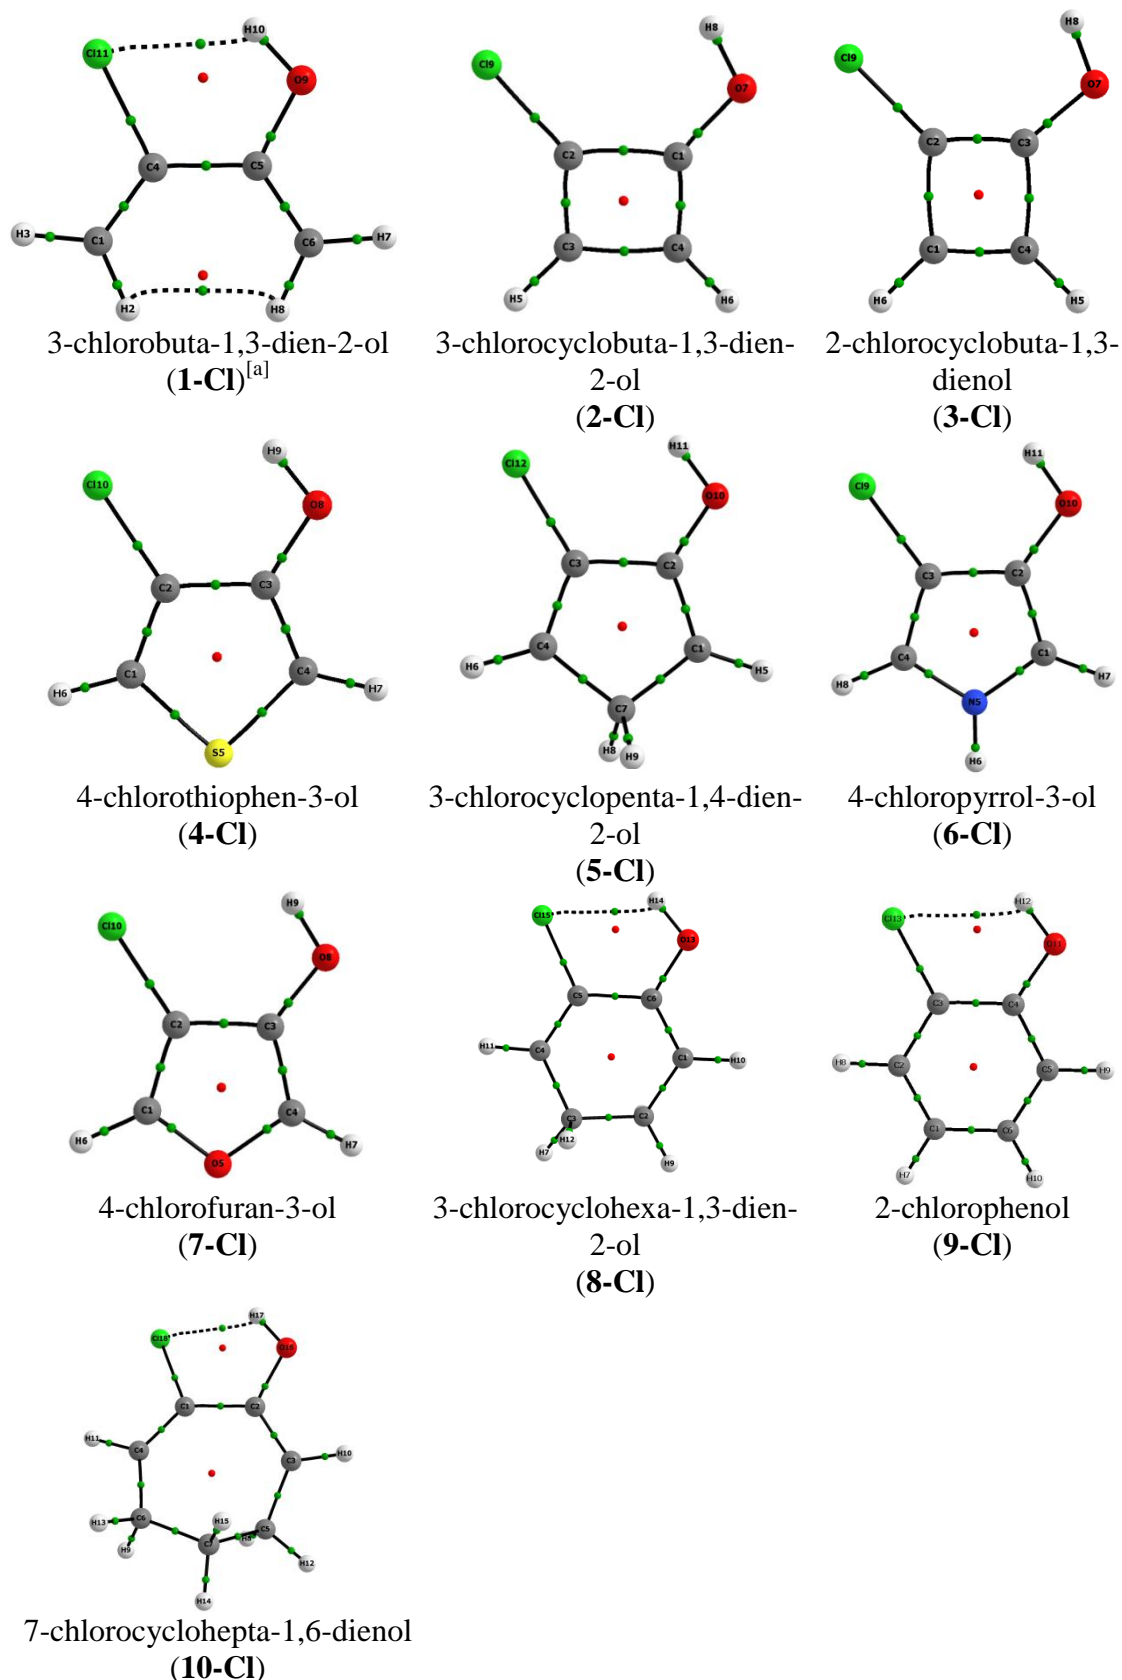

<sup>[a]</sup> H...H interaction is unstable (ellipticity = 1.370 au) and does not affect considerably the geometrical parameters of this compound.

**Figure S2.** Molecular graphs of compounds **1-Cl** to **10-Cl** (conformers A). Green points represent bond critical points (BCP) and red points indicate ring critical points (RCP).

## Bromine derivatives

**Table S3:** Selected geometric parameters for compounds **1-Br** to **10-Br** (interatomic distances in angstroms and bond angles in degrees).

| Compound     | $r(\text{Br}\cdots\text{HO})$ | $r(\text{Br}\cdots\text{O})$ | $\angle \text{O-C-C}(\text{Br})$ | $\angle \text{Br-C-C}(\text{O})$ | $\angle \text{C-C}(\text{Br})-\text{C}(\text{O})$ | $\angle \text{C-C}(\text{O})-\text{C}(\text{Br})$ |
|--------------|-------------------------------|------------------------------|----------------------------------|----------------------------------|---------------------------------------------------|---------------------------------------------------|
| <b>1-Br</b>  | <b>2.34</b>                   | <b>3.03</b>                  | <b>118.5</b>                     | <b>115.4</b>                     | <b>127.6</b>                                      | <b>122.9</b>                                      |
| <b>2-Br</b>  | 3.31                          | 3.76                         | 132.1                            | 132.6                            | 89.5                                              | 90.9                                              |
| <b>3-Br</b>  | 3.38                          | 3.72                         | 139.5                            | 135.4                            | 88.8                                              | 90.9                                              |
| <b>4-Br</b>  | 2.64                          | 3.24                         | 124.8                            | 121.2                            | 114.1                                             | 111.8                                             |
| <b>5-Br</b>  | 2.66                          | 3.26                         | 124.1                            | 121.3                            | 110.8                                             | 108.5                                             |
| <b>6-Br</b>  | 2.80                          | 3.36                         | 127.6                            | 124.3                            | 108.4                                             | 107.0                                             |
| <b>7-Br</b>  | 2.82                          | 3.37                         | 127.5                            | 124.6                            | 107.0                                             | 105.8                                             |
| <b>8-Br</b>  | 2.46                          | 3.11                         | 120.2                            | 117.1                            | 122.3                                             | 118.8                                             |
| <b>9-Br</b>  | 2.50                          | 3.13                         | 123.6                            | 118.6                            | 121.5                                             | 118.4                                             |
| <b>10-Br</b> | 2.38                          | 3.05                         | 118.2                            | 113.5                            | 131.0                                             | 123.8                                             |

**Table S4:** Electronic density and its Laplacian at the H-bond BCP ( $\rho_{\text{HBCP}}$  and  $\nabla^2\rho_{\text{HBCP}}$ , respectively) and hydroxyl hydrogen integrated atomic properties for the conformers **A** and **B** of 3-bromobuta-1,3-dien-2-ol (**1-Br**), obtained by QTAIM (in au).

| <b>Conformer</b> | $\rho_{\text{HBCP}}$ | $\nabla^2\rho_{\text{HBCP}}$ | $q(\text{H})$ | $E(\text{H})$ | $M_1(\text{H})$ | $V(\text{H})$ |
|------------------|----------------------|------------------------------|---------------|---------------|-----------------|---------------|
| <b>A</b>         | 0.024                | +0.063                       | +0.591        | -0.3470       | 0.165           | 0.018         |
| <b>B</b>         | -                    | -                            | +0.590        | -0.3524       | 0.169           | 0.013         |

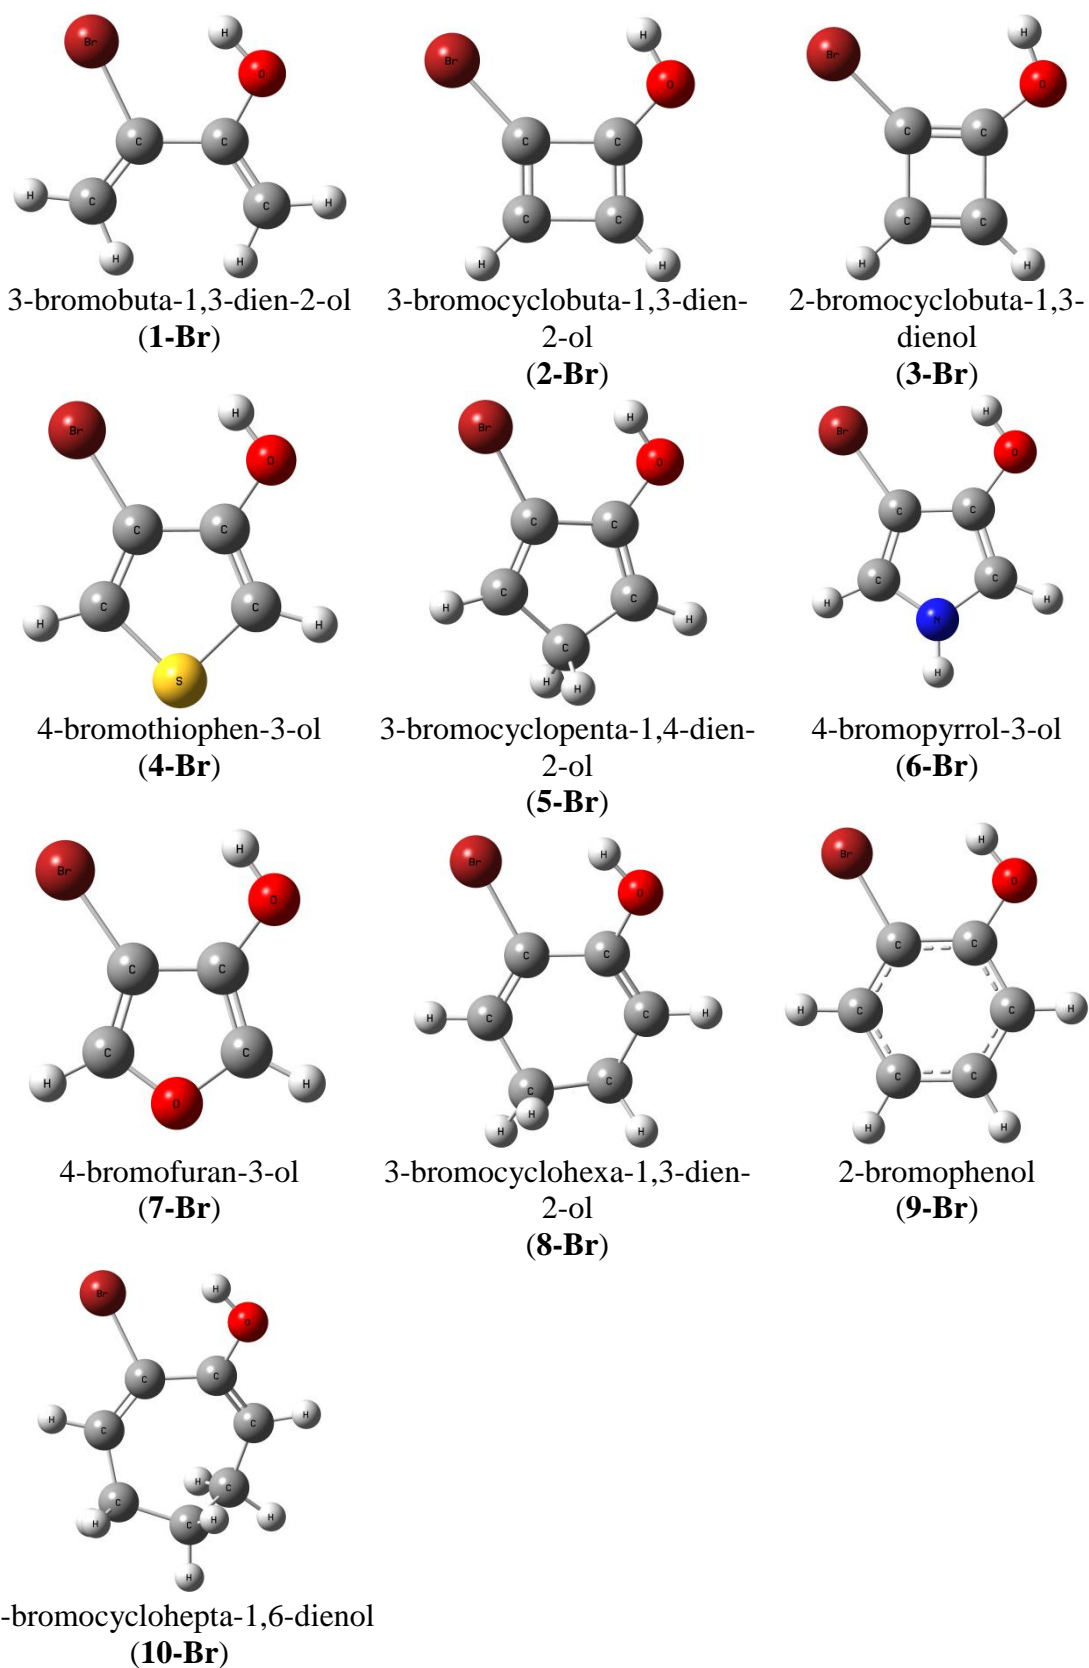

**Figure S3:** Geometric representations for the conformer A of compounds **1-Br** to **10-Br**.



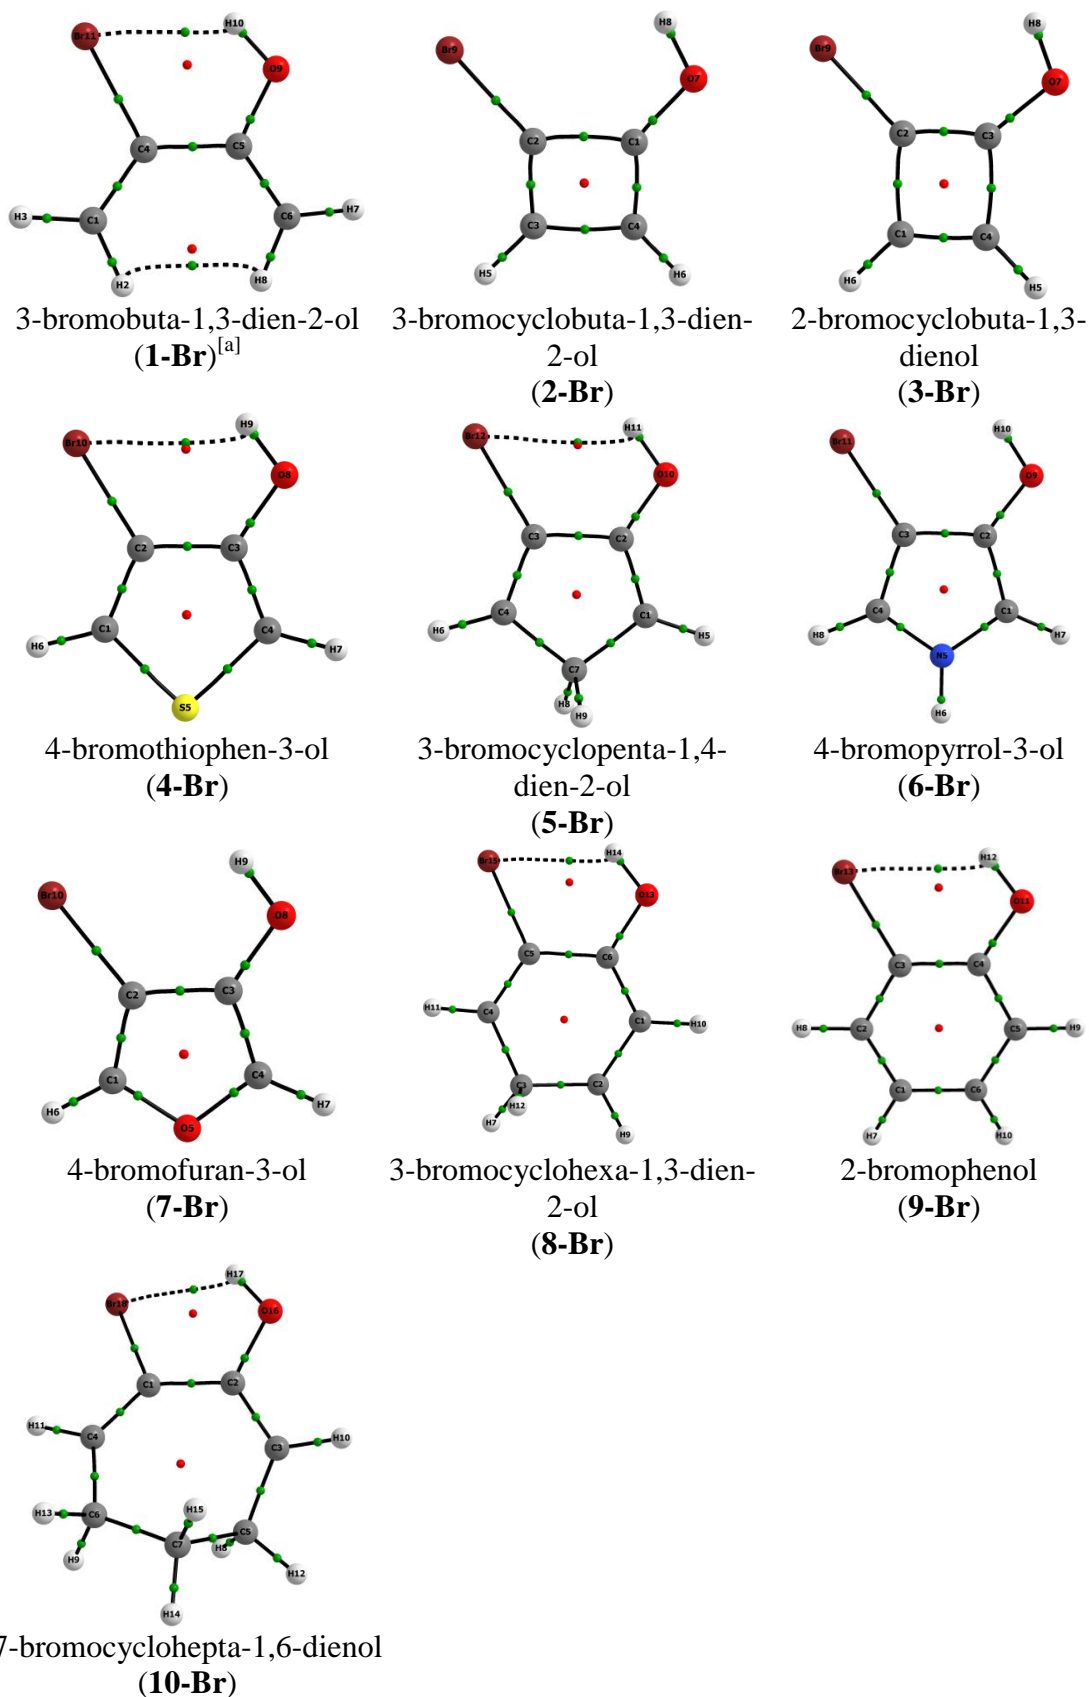

<sup>[a]</sup> H...H interaction is unstable (ellipticity c.a. 1.000 au) and does not affect considerably the geometrical parameters in this compound.

**Figure S4.** Molecular graphs of compounds **1-Br** to **10-Br** (conformer A). Green points represent bond critical points (BCP) and red points indicate ring critical points (RCP).

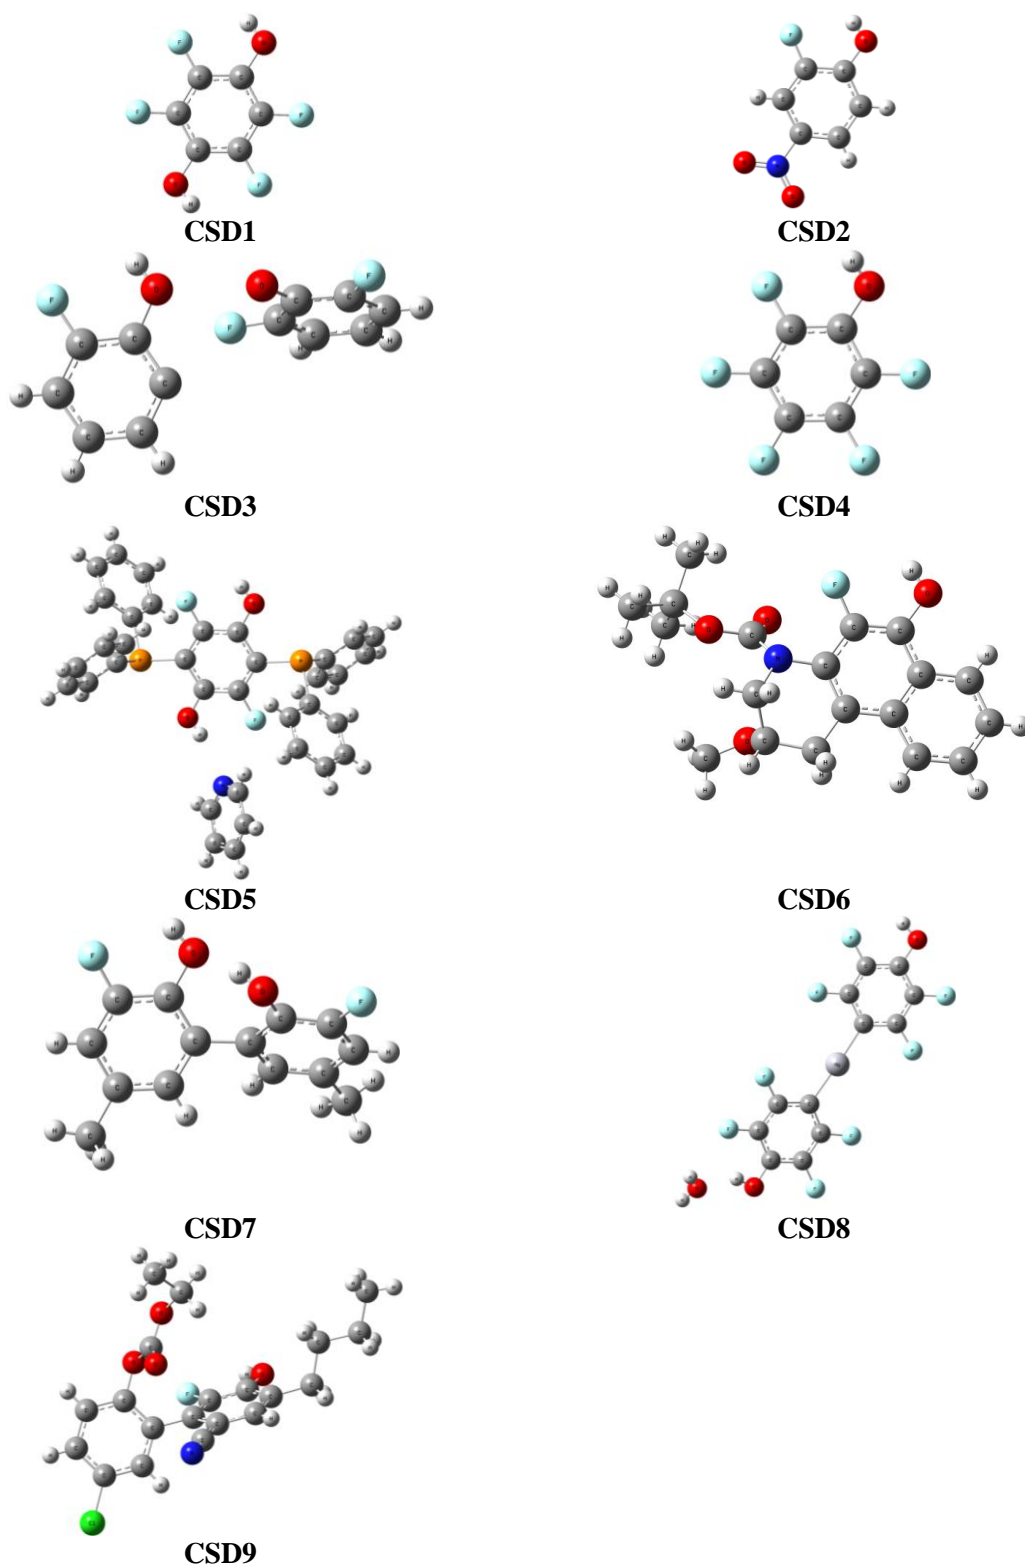

**Figure S5:** Structure and geometrical representation of 2-fluorophenol derivatives obtained from the Cambridge Structural Database.

**Table S5:** Selected geometric parameters for the reference compound **1** and of 2-fluorophenol derivatives obtained from the Cambridge Structural Database (interatomic distances in angstroms and bond angles in degrees).

| <b>Compound</b> | <b><math>r(\text{F}\cdots\text{HO})</math></b> | <b><math>r(\text{F}\cdots\text{O})</math></b> | <b><math>\angle\text{O-C-C(F)}</math></b> | <b><math>\angle\text{F-C-C(O)}</math></b> | <b><math>\angle\text{C-C(F)-C(O)}</math></b> | <b><math>\angle\text{C-C(O)-C(F)}</math></b> |
|-----------------|------------------------------------------------|-----------------------------------------------|-------------------------------------------|-------------------------------------------|----------------------------------------------|----------------------------------------------|
| <b>1</b>        | <b>1.990</b>                                   | <b>2.575</b>                                  | <b>115.7</b>                              | <b>111.2</b>                              | <b>130.0</b>                                 | <b>124.3</b>                                 |
| <b>CSD1</b>     | 2.374                                          | 2.774                                         | 123.3                                     | 118.9                                     | 121.4                                        | 117.4                                        |
| <b>CSD2</b>     | 2.319                                          | 2.738                                         | 122.6                                     | 116.8                                     | 123.1                                        | 118.2                                        |
| <b>CSD3</b>     | 2.345                                          | 2.690                                         | 119.9                                     | 117.9                                     | 122.2                                        | 118.5                                        |
| <b>CSD4</b>     | 2.447                                          | 2.774                                         | 123.1                                     | 119.0                                     | 121.7                                        | 117.6                                        |
| <b>CSD5</b>     | 2.277                                          | 2.704                                         | 120.4                                     | 117.8                                     | 122.8                                        | 120.9                                        |
| <b>CSD6</b>     | 2.335                                          | 2.725                                         | 122.8                                     | 118.1                                     | 122.8                                        | 118.9                                        |
| <b>CSD7</b>     | 2.291                                          | 2.719                                         | 121.7                                     | 116.6                                     | 123.1                                        | 118.9                                        |
| <b>CSD8</b>     | 2.278                                          | 2.798                                         | 124.5                                     | 117.9                                     | 121.4                                        | 117.2                                        |
| <b>CSD9</b>     | 2.300                                          | 2.739                                         | 122.1                                     | 117.6                                     | 123.9                                        | 119.7                                        |

## References of compounds obtained from the Cambridge Structural Database (CSD):

**CSD1:** Thalladi, V. R.; Weiss, H. C.; Boese, R.; Nangia, A.; Desiraju, G. R. *Acta Cryst.* **1999**, *B55*, 1005.

**CSD2:** Chambers, R. D.; Fox, M. A.; Sandford, G.; Trmcic, G.; Goeta, A., *J. Fluor. Chem.*, **2007**, *128*, 29.

**CSD3:** Oswald, I. D. H.; Allan, D. R.; Motherwell, W. D. S.; Parsons, S., *Struct. Sci.*, **2005**, *61*, 69.

**CSD4:** Gdaniec, M., *Crist. Eng. Comm.*, **2007**, *9*, 286.

**CSD5:** Pignotti, L. R.; Kongprakaiwoot, N.; Brennessel, W. W.; Baltrusaitis, J.; Luck, R. L.; Urnezius, E., *J. Organomet. Chem.*, **2008**, *693*, 3263.

**CSD6:** Boger, D. L.; Brunette, S. R.; Garbaccio, R. M., *J. Org. Chem.*, **2001**, *66*, 5163.

**CSD7:** Kirste, A.; Nieger, M.; Malkowsky, I. M.; Stecker, F.; Fischer, A.; Waldvogel, S. R., *Chem. Eur. J.*, **2009**, *15*, 2273.

**CSD8:** Deacon, G. b.; Felder, P. W.; Junk, P. C.; Buschbaum, K. M.; Ness, T. J.; Quitmann, C. C., *Inorg. Chem. Acta*, **2005**, *358*, 4389.

**CSD9:** Ibad, M. F.; Abid, O. R.; Adeel, M.; Nawaz, M.; Wolf, V.; Villinger, A.; Langer, P., *J. Org. Chem.*, **2010**, *75*, 8315.
